# Supplementary material for: Identification of hub genes and biological pathways in hepatocellular carcinoma by integrated bioinformatics analysis
Source: PeerJ. 2021 Jan 19;9:e10594. doi: 10.7717/peerj.10594 (PMC7821758; doi:10.7717/peerj.10594)
Supplement: Supplemental Information 6 — The results which show the genes contained in each module. [file peerj-09-10594-s006.csv]

Id	Module
ENSG00000162073.12	1
ENSG00000185163.8	1
ENSG00000182973.17	1
ENSG00000092208.15	1
ENSG00000163026.10	1
ENSG00000125454.10	1
ENSG00000115355.14	1
ENSG00000148835.10	1
ENSG00000213281.4	1
ENSG00000129484.12	1
ENSG00000101412.12	1
ENSG00000149679.10	1
ENSG00000064703.10	1
ENSG00000105821.13	1
ENSG00000164002.10	1
ENSG00000120256.8	1
ENSG00000178966.14	1
ENSG00000049541.9	1
ENSG00000280206.1	1
ENSG00000273611.3	1
ENSG00000167325.13	1
ENSG00000137310.10	1
ENSG00000159147.16	1
ENSG00000164611.11	1
ENSG00000167513.7	1
ENSG00000104889.4	1
ENSG00000163964.12	1
ENSG00000187522.12	1
ENSG00000120539.13	1
ENSG00000278259.3	1
ENSG00000163950.11	1
ENSG00000198618.5	1
ENSG00000136261.13	1
ENSG00000132768.12	1
ENSG00000105993.13	1
ENSG00000065600.11	1
ENSG00000033050.6	1
ENSG00000108010.10	1
ENSG00000120254.14	1
ENSG00000277443.1	1
ENSG00000138385.14	1
ENSG00000055044.9	1
ENSG00000111361.11	1
ENSG00000165661.14	1
ENSG00000168439.15	1
ENSG00000116120.9	1
ENSG00000112290.11	1
ENSG00000142230.10	1
ENSG00000118655.4	1
ENSG00000166986.11	1
ENSG00000106443.13	1
ENSG00000186298.10	1
ENSG00000123416.14	1
ENSG00000115211.14	1
ENSG00000107937.17	1
ENSG00000120253.12	1
ENSG00000189057.9	1
ENSG00000168005.7	1
ENSG00000182481.7	1
ENSG00000144034.13	1
ENSG00000138382.12	1
ENSG00000123975.4	1
ENSG00000089280.17	1
ENSG00000146731.9	1
ENSG00000130921.6	1
ENSG00000137404.13	1
ENSG00000123374.9	1
ENSG00000095319.13	1
ENSG00000139726.9	1
ENSG00000170633.15	1
ENSG00000184992.10	1
ENSG00000042088.12	1
ENSG00000147874.9	1
ENSG00000087586.16	1
ENSG00000162396.5	1
ENSG00000159593.13	1
ENSG00000135698.8	1
ENSG00000111364.14	1
ENSG00000153179.10	1
ENSG00000171865.8	1
ENSG00000072864.11	1
ENSG00000115750.15	1
ENSG00000112118.16	1
ENSG00000152240.11	1
ENSG00000130816.13	1
ENSG00000137337.13	1
ENSG00000124795.13	1
ENSG00000177674.14	1
ENSG00000111602.10	1
ENSG00000156384.13	1
ENSG00000101057.14	1
ENSG00000062822.11	1
ENSG00000221829.8	1
ENSG00000249115.7	1
ENSG00000132781.16	1
ENSG00000058804.11	1
ENSG00000125450.9	1
ENSG00000116922.13	1
ENSG00000119203.12	1
ENSG00000115241.10	1
ENSG00000032389.11	1
ENSG00000167900.10	1
ENSG00000131462.6	1
ENSG00000084693.14	1
ENSG00000011260.12	1
ENSG00000123352.16	1
ENSG00000162607.11	1
ENSG00000151465.12	1
ENSG00000162521.17	1
ENSG00000081870.10	1
ENSG00000134222.15	1
ENSG00000128944.12	1
ENSG00000100297.14	1
ENSG00000104738.15	1
ENSG00000132646.9	1
ENSG00000076382.15	1
ENSG00000119403.12	1
ENSG00000159055.3	1
ENSG00000077152.8	1
ENSG00000031691.6	1
ENSG00000136108.13	1
ENSG00000167670.14	1
ENSG00000116497.16	1
ENSG00000123080.9	1
ENSG00000100749.6	1
ENSG00000111247.13	1
ENSG00000176890.14	1
ENSG00000136824.17	1
ENSG00000170779.10	1
ENSG00000164032.10	1
ENSG00000013810.17	1
ENSG00000117399.12	1
ENSG00000170144.17	1
ENSG00000010292.11	1
ENSG00000122952.15	1
ENSG00000133119.11	1
ENSG00000125871.12	1
ENSG00000168496.3	1
ENSG00000165501.15	1
ENSG00000105486.12	1
ENSG00000088325.14	1
ENSG00000014138.7	1
ENSG00000111445.12	1
ENSG00000131747.13	1
ENSG00000161800.11	1
ENSG00000166881.8	1
ENSG00000159596.6	1
ENSG00000075131.8	1
ENSG00000142856.15	1
ENSG00000121211.6	1
ENSG00000164087.6	1
ENSG00000088035.14	1
ENSG00000124207.15	1
ENSG00000152455.14	1
ENSG00000280120.1	1
ENSG00000025156.11	1
ENSG00000089195.13	1
ENSG00000073111.12	1
ENSG00000113368.10	1
ENSG00000131153.7	1
ENSG00000137804.11	1
ENSG00000151725.10	1
ENSG00000117632.19	1
ENSG00000076003.4	1
ENSG00000132780.15	1
ENSG00000149636.14	1
ENSG00000164104.10	1
ENSG00000175643.8	1
ENSG00000086015.19	1
ENSG00000154222.13	1
ENSG00000175216.13	1
ENSG00000171792.9	1
ENSG00000196262.12	1
ENSG00000106105.12	1
ENSG00000095002.11	1
ENSG00000111581.8	1
ENSG00000114346.12	1
ENSG00000149503.11	1
ENSG00000108468.13	1
ENSG00000145604.14	1
ENSG00000184220.9	1
ENSG00000121073.12	1
ENSG00000108829.9	1
ENSG00000122965.9	1
ENSG00000165819.10	1
ENSG00000139719.8	1
ENSG00000077514.7	1
ENSG00000138363.13	1
ENSG00000175792.10	1
ENSG00000116062.13	1
ENSG00000100526.18	1
ENSG00000203760.7	1
ENSG00000175063.15	1
ENSG00000198056.12	1
ENSG00000171848.12	1
ENSG00000135446.15	1
ENSG00000105011.7	1
ENSG00000101447.12	1
ENSG00000101224.16	1
ENSG00000180104.14	1
ENSG00000028310.16	1
ENSG00000133398.3	1
ENSG00000249915.6	1
ENSG00000113387.10	1
ENSG00000113569.14	1
ENSG00000113460.11	1
ENSG00000113456.17	1
ENSG00000082068.7	1
ENSG00000166801.14	1
ENSG00000139437.16	1
ENSG00000102054.16	1
ENSG00000166508.16	1
ENSG00000132182.10	1
ENSG00000241127.6	1
ENSG00000150990.6	1
ENSG00000166226.11	1
ENSG00000110104.10	1
ENSG00000111641.9	1
ENSG00000163655.14	1
ENSG00000163781.11	1
ENSG00000163918.9	1
ENSG00000185798.7	1
ENSG00000136518.15	1
ENSG00000174013.7	1
ENSG00000115233.10	1
ENSG00000155636.13	1
ENSG00000100823.10	1
ENSG00000115484.13	1
ENSG00000075188.7	1
ENSG00000134057.13	1
ENSG00000122565.17	1
ENSG00000018699.10	1
ENSG00000152422.14	1
ENSG00000138430.14	1
ENSG00000150753.10	1
ENSG00000132341.10	1
ENSG00000153015.14	1
ENSG00000213551.4	1
ENSG00000130338.11	1
ENSG00000134262.11	1
ENSG00000141577.12	1
ENSG00000154473.16	1
ENSG00000141568.18	1
ENSG00000108651.8	1
ENSG00000164649.18	1
ENSG00000108423.13	1
ENSG00000141543.8	1
ENSG00000110958.14	1
ENSG00000108384.13	1
ENSG00000188612.10	1
ENSG00000205581.9	1
ENSG00000144401.13	1
ENSG00000135476.10	1
ENSG00000275700.3	1
ENSG00000070756.12	2
ENSG00000104408.8	2
ENSG00000183665.5	2
ENSG00000164941.12	2
ENSG00000179041.3	2
ENSG00000121022.12	2
ENSG00000120526.9	2
ENSG00000164934.12	2
ENSG00000164983.7	2
ENSG00000170631.13	2
ENSG00000164695.4	2
ENSG00000104518.9	2
ENSG00000182325.9	2
ENSG00000173137.10	2
ENSG00000180921.6	2
ENSG00000178719.15	2
ENSG00000270673.1	2
ENSG00000253948.1	2
ENSG00000253716.4	2
ENSG00000164924.16	2
ENSG00000196922.9	2
ENSG00000104412.6	2
ENSG00000104375.14	2
ENSG00000253738.1	2
ENSG00000047249.15	2
ENSG00000137269.13	2
ENSG00000167632.13	2
ENSG00000014164.6	2
ENSG00000104442.8	2
ENSG00000040341.16	2
ENSG00000164751.13	2
ENSG00000185730.6	2
ENSG00000167904.13	2
ENSG00000155100.9	2
ENSG00000129292.19	2
ENSG00000164961.14	2
ENSG00000183309.10	2
ENSG00000171316.10	2
ENSG00000169398.18	2
ENSG00000164754.11	2
ENSG00000104517.11	2
ENSG00000123908.10	2
ENSG00000164944.10	2
ENSG00000137574.9	2
ENSG00000035681.6	2
ENSG00000156469.7	2
ENSG00000147669.9	2
ENSG00000156795.5	2
ENSG00000156170.11	2
ENSG00000120963.10	2
ENSG00000153317.13	2
ENSG00000253729.6	2
ENSG00000171045.13	2
ENSG00000104341.15	2
ENSG00000104312.7	2
ENSG00000246263.2	2
ENSG00000147676.12	2
ENSG00000164919.9	2
ENSG00000176731.10	2
ENSG00000189376.10	2
ENSG00000156467.8	2
ENSG00000156026.13	2
ENSG00000184428.11	2
ENSG00000104529.16	2
ENSG00000185803.7	2
ENSG00000104472.8	2
ENSG00000182307.11	2
ENSG00000156831.6	2
ENSG00000071894.13	2
ENSG00000172172.6	2
ENSG00000185122.9	2
ENSG00000179886.5	2
ENSG00000120533.11	2
ENSG00000147677.9	2
ENSG00000180900.15	2
ENSG00000154582.15	2
ENSG00000250571.5	2
ENSG00000147687.15	2
ENSG00000179091.4	2
ENSG00000235173.5	2
ENSG00000179632.8	2
ENSG00000196378.10	2
ENSG00000198169.7	2
ENSG00000160959.6	2
ENSG00000023287.11	2
ENSG00000170619.9	2
ENSG00000179526.15	2
ENSG00000160972.8	2
ENSG00000261236.4	2
ENSG00000187954.11	2
ENSG00000160948.12	2
ENSG00000178896.6	2
ENSG00000197858.9	2
ENSG00000147684.6	2
ENSG00000179950.12	2
ENSG00000104524.12	2
ENSG00000167700.7	2
ENSG00000170791.16	2
ENSG00000153310.17	2
ENSG00000155097.10	2
ENSG00000147679.10	2
ENSG00000158882.11	3
ENSG00000125398.5	3
ENSG00000116750.12	3
ENSG00000159348.11	3
ENSG00000143324.12	3
ENSG00000117153.14	3
ENSG00000094975.12	3
ENSG00000171806.10	3
ENSG00000154380.15	3
ENSG00000143390.16	3
ENSG00000182134.14	3
ENSG00000116604.16	3
ENSG00000143774.15	3
ENSG00000154429.9	3
ENSG00000143158.9	3
ENSG00000162704.14	3
ENSG00000163344.5	3
ENSG00000143314.11	3
ENSG00000179085.7	3
ENSG00000116586.10	3
ENSG00000135837.14	3
ENSG00000271601.3	3
ENSG00000256968.1	3
ENSG00000266472.4	3
ENSG00000143740.13	3
ENSG00000173207.11	3
ENSG00000243364.6	3
ENSG00000158710.13	3
ENSG00000159377.9	3
ENSG00000163382.10	3
ENSG00000160688.17	3
ENSG00000132676.14	3
ENSG00000162734.11	3
ENSG00000162736.14	3
ENSG00000158850.13	3
ENSG00000160818.15	3
ENSG00000143570.16	3
ENSG00000143179.11	3
ENSG00000010165.18	3
ENSG00000117593.9	3
ENSG00000117362.11	3
ENSG00000160803.7	3
ENSG00000198952.8	3
ENSG00000122218.13	3
ENSG00000160710.14	3
ENSG00000163472.17	3
ENSG00000160767.19	3
ENSG00000160753.14	3
ENSG00000213064.8	3
ENSG00000197622.11	3
ENSG00000198700.8	3
ENSG00000249602.1	3
ENSG00000081721.10	3
ENSG00000143443.9	3
ENSG00000132694.17	3
ENSG00000143322.18	3
ENSG00000116539.9	3
ENSG00000143367.14	3
ENSG00000117523.14	3
ENSG00000197965.10	3
ENSG00000143624.12	3
ENSG00000120370.11	3
ENSG00000143622.9	3
ENSG00000143393.15	3
ENSG00000143549.18	3
ENSG00000198837.8	3
ENSG00000143401.13	3
ENSG00000163374.18	3
ENSG00000265241.5	3
ENSG00000143457.9	3
ENSG00000135845.8	3
ENSG00000163125.14	3
ENSG00000163444.10	3
ENSG00000117360.11	3
ENSG00000160679.11	3
ENSG00000143373.16	3
ENSG00000143621.15	3
ENSG00000143442.20	3
ENSG00000143633.11	3
ENSG00000143376.11	3
ENSG00000186141.7	3
ENSG00000116906.10	3
ENSG00000163155.10	3
ENSG00000135775.12	3
ENSG00000075945.11	3
ENSG00000143398.18	3
ENSG00000143363.14	3
ENSG00000143258.14	3
ENSG00000143379.11	3
ENSG00000136631.11	3
ENSG00000163468.13	3
ENSG00000143222.10	3
ENSG00000143207.18	3
ENSG00000183155.4	3
ENSG00000160789.18	3
ENSG00000158773.13	3
ENSG00000116957.11	3
ENSG00000143486.14	3
ENSG00000116161.16	3
ENSG00000162910.17	3
ENSG00000143811.15	3
ENSG00000163348.3	3
ENSG00000081692.11	3
ENSG00000163479.12	3
ENSG00000228106.4	3
ENSG00000160783.18	3
ENSG00000163463.10	3
ENSG00000230124.5	3
ENSG00000116857.15	3
ENSG00000143771.10	3
ENSG00000143761.12	3
ENSG00000143256.4	3
ENSG00000154370.12	3
ENSG00000182004.11	3
ENSG00000143793.11	3
ENSG00000117335.17	3
ENSG00000118197.12	3
ENSG00000116918.12	3
ENSG00000173726.9	3
ENSG00000067533.5	3
ENSG00000178096.8	3
ENSG00000159352.14	3
ENSG00000117597.16	3
ENSG00000143368.9	3
ENSG00000143436.9	3
ENSG00000173171.13	3
ENSG00000116199.10	3
ENSG00000125459.13	3
ENSG00000163159.10	3
ENSG00000143553.9	3
ENSG00000143575.13	3
ENSG00000159445.11	3
ENSG00000160741.15	3
ENSG00000116521.9	3
ENSG00000143294.13	3
ENSG00000143224.16	3
ENSG00000188295.13	3
ENSG00000143614.7	3
ENSG00000116698.19	3
ENSG00000116128.8	3
ENSG00000143157.10	3
ENSG00000117139.15	3
ENSG00000158796.15	3
ENSG00000157181.13	3
ENSG00000143315.6	3
ENSG00000117475.12	3
ENSG00000143319.15	3
ENSG00000143183.15	3
ENSG00000143799.11	3
ENSG00000135763.8	3
ENSG00000035687.9	3
ENSG00000136628.16	3
ENSG00000162819.10	3
ENSG00000010072.14	3
ENSG00000136643.10	3
ENSG00000143155.11	3
ENSG00000160714.8	3
ENSG00000143748.16	3
ENSG00000174606.11	3
ENSG00000135823.12	3
ENSG00000118200.13	3
ENSG00000153207.13	3
ENSG00000069248.11	3
ENSG00000143493.11	3
ENSG00000118873.14	3
ENSG00000121644.17	3
ENSG00000173409.12	3
ENSG00000152904.10	3
ENSG00000135862.5	3
ENSG00000232671.4	3
ENSG00000123684.11	3
ENSG00000117697.13	3
ENSG00000198860.10	3
ENSG00000143420.16	3
ENSG00000168275.13	3
ENSG00000163156.10	3
ENSG00000143569.17	3
ENSG00000175137.10	3
ENSG00000187961.12	4
ENSG00000259865.1	4
ENSG00000082512.13	4
ENSG00000101104.11	4
ENSG00000186166.7	4
ENSG00000175455.13	4
ENSG00000163482.10	4
ENSG00000204305.12	4
ENSG00000263528.6	4
ENSG00000259250.1	4
ENSG00000046651.13	4
ENSG00000164828.16	4
ENSG00000141258.11	4
ENSG00000146067.14	4
ENSG00000221978.10	4
ENSG00000215252.10	4
ENSG00000168264.9	4
ENSG00000100092.19	4
ENSG00000116584.16	4
ENSG00000258297.1	4
ENSG00000252817.2	4
ENSG00000172932.13	4
ENSG00000240731.1	4
ENSG00000131584.17	4
ENSG00000205517.11	4
ENSG00000273137.1	4
ENSG00000227392.1	4
ENSG00000255717.5	4
ENSG00000131051.19	4
ENSG00000158411.9	4
ENSG00000270189.1	4
ENSG00000267523.1	4
ENSG00000269352.1	4
ENSG00000079134.10	4
ENSG00000132481.5	4
ENSG00000276381.1	4
ENSG00000076928.16	4
ENSG00000102901.11	4
ENSG00000278768.1	4
ENSG00000214135.7	4
ENSG00000122435.8	4
ENSG00000143842.13	4
ENSG00000141569.9	4
ENSG00000106348.15	4
ENSG00000197355.9	4
ENSG00000265298.1	4
ENSG00000278820.1	4
ENSG00000176444.17	4
ENSG00000167766.17	4
ENSG00000265917.1	4
ENSG00000124222.20	4
ENSG00000163029.14	4
ENSG00000207650.1	4
ENSG00000185485.13	4
ENSG00000242086.7	4
ENSG00000059588.8	4
ENSG00000271870.1	4
ENSG00000207547.1	4
ENSG00000174652.16	4
ENSG00000171163.14	4
ENSG00000234771.3	4
ENSG00000242861.1	4
ENSG00000198563.12	4
ENSG00000272849.1	4
ENSG00000204149.8	4
ENSG00000132485.11	4
ENSG00000270060.1	4
ENSG00000227671.4	4
ENSG00000207554.1	4
ENSG00000229152.2	4
ENSG00000138834.11	4
ENSG00000188206.6	4
ENSG00000177853.13	4
ENSG00000276550.3	4
ENSG00000277201.1	4
ENSG00000258682.1	4
ENSG00000114857.16	4
ENSG00000227329.2	4
ENSG00000132680.9	4
ENSG00000128159.10	4
ENSG00000147162.12	4
ENSG00000146830.9	4
ENSG00000135164.17	4
ENSG00000185246.16	4
ENSG00000173209.21	4
ENSG00000004534.13	4
ENSG00000232931.4	4
ENSG00000167615.15	4
ENSG00000108848.14	4
ENSG00000184863.9	4
ENSG00000152117.16	4
ENSG00000109920.11	4
ENSG00000245849.5	4
ENSG00000133624.12	4
ENSG00000117625.12	4
ENSG00000198625.11	4
ENSG00000099326.7	4
ENSG00000275888.1	4
ENSG00000257270.1	4
ENSG00000188599.16	4
ENSG00000131797.11	4
ENSG00000236287.6	4
ENSG00000214753.2	4
ENSG00000037042.8	4
ENSG00000005801.15	4
ENSG00000116001.14	4
ENSG00000257511.1	4
ENSG00000258890.5	4
ENSG00000172613.6	4
ENSG00000196739.13	4
ENSG00000143643.11	4
ENSG00000108773.9	4
ENSG00000007392.15	4
ENSG00000083838.14	5
ENSG00000178691.9	5
ENSG00000165458.12	5
ENSG00000124783.11	5
ENSG00000064933.15	5
ENSG00000127022.13	5
ENSG00000204899.5	5
ENSG00000196700.6	5
ENSG00000100441.8	5
ENSG00000103365.14	5
ENSG00000181045.13	5
ENSG00000140265.11	5
ENSG00000153046.16	5
ENSG00000084092.6	5
ENSG00000122696.11	5
ENSG00000112763.14	5
ENSG00000167173.17	5
ENSG00000169045.16	5
ENSG00000020256.18	5
ENSG00000165275.8	5
ENSG00000125447.15	5
ENSG00000130299.15	5
ENSG00000149428.17	5
ENSG00000100023.16	5
ENSG00000133422.11	5
ENSG00000103496.13	5
ENSG00000105063.17	5
ENSG00000196214.9	5
ENSG00000149657.18	5
ENSG00000105723.10	5
ENSG00000196476.10	5
ENSG00000063169.9	5
ENSG00000080845.16	5
ENSG00000119574.11	5
ENSG00000197483.9	5
ENSG00000125505.15	5
ENSG00000126461.13	5
ENSG00000160336.13	5
ENSG00000268205.1	5
ENSG00000104973.13	5
ENSG00000269867.1	5
ENSG00000105287.11	5
ENSG00000185453.11	5
ENSG00000074219.12	5
ENSG00000167625.9	5
ENSG00000167840.12	5
ENSG00000197037.9	5
ENSG00000004975.10	5
ENSG00000134815.17	5
ENSG00000130311.9	5
ENSG00000261221.3	5
ENSG00000052749.12	5
ENSG00000115652.13	5
ENSG00000115694.13	5
ENSG00000039650.8	5
ENSG00000106692.12	5
ENSG00000053900.9	5
ENSG00000163516.12	5
ENSG00000214367.6	5
ENSG00000204822.6	5
ENSG00000168395.13	5
ENSG00000168397.15	5
ENSG00000125863.16	5
ENSG00000168876.7	5
ENSG00000004766.14	5
ENSG00000122512.13	5
ENSG00000164889.11	5
ENSG00000122550.16	5
ENSG00000196652.10	5
ENSG00000146842.15	5
ENSG00000135250.15	5
ENSG00000173653.6	5
ENSG00000136243.15	5
ENSG00000105778.16	5
ENSG00000173933.18	5
ENSG00000088876.10	5
ENSG00000113761.10	5
ENSG00000196151.9	5
ENSG00000101040.18	5
ENSG00000228989.1	5
ENSG00000166685.10	5
ENSG00000166949.14	5
ENSG00000005206.15	5
ENSG00000175387.14	5
ENSG00000078246.14	5
ENSG00000126603.7	5
ENSG00000164284.13	5
ENSG00000112855.13	5
ENSG00000119965.11	5
ENSG00000119906.10	5
ENSG00000083817.8	5
ENSG00000123643.11	5
ENSG00000213024.9	5
ENSG00000235106.7	5
ENSG00000102882.10	5
ENSG00000119401.10	5
ENSG00000165699.12	5
ENSG00000126903.14	5
ENSG00000198000.10	5
ENSG00000178921.12	5
ENSG00000091127.12	5
ENSG00000005156.10	5
ENSG00000158623.13	5
ENSG00000166444.16	5
ENSG00000122783.15	5
ENSG00000198464.12	5
ENSG00000187514.13	5
ENSG00000142330.18	5
ENSG00000074266.16	5
ENSG00000131653.11	5
ENSG00000103197.15	5
ENSG00000118900.13	5
ENSG00000103199.12	5
ENSG00000081760.15	5
ENSG00000168958.18	5
ENSG00000173226.15	5
ENSG00000188566.10	5
ENSG00000043143.19	5
ENSG00000144589.19	5
ENSG00000186575.16	5
ENSG00000006451.6	5
ENSG00000010803.15	5
ENSG00000214517.7	5
ENSG00000205250.7	5
ENSG00000148297.14	5
ENSG00000094916.12	5
ENSG00000167987.9	5
ENSG00000099917.16	5
ENSG00000063244.11	5
ENSG00000106290.13	5
ENSG00000142039.3	5
ENSG00000030110.11	5
ENSG00000135372.7	5
ENSG00000122678.13	5
ENSG00000087157.17	5
ENSG00000205903.5	5
ENSG00000168883.18	5
ENSG00000161202.16	5
ENSG00000106603.16	5
ENSG00000113648.15	5
ENSG00000187147.16	5
ENSG00000130669.16	5
ENSG00000153574.8	5
ENSG00000090372.13	5
ENSG00000148337.18	5
ENSG00000149262.15	5
ENSG00000166452.10	5
ENSG00000111412.5	5
ENSG00000221909.2	5
ENSG00000136048.12	5
ENSG00000124766.5	5
ENSG00000140548.8	5
ENSG00000152102.16	5
ENSG00000132664.10	5
ENSG00000101152.9	5
ENSG00000139651.10	5
ENSG00000011275.17	5
ENSG00000088888.16	5
ENSG00000182095.13	5
ENSG00000078699.20	5
ENSG00000175970.8	5
ENSG00000146247.13	5
ENSG00000184634.14	5
ENSG00000127334.10	5
ENSG00000061936.8	5
ENSG00000167548.13	5
ENSG00000160305.16	5
ENSG00000101639.17	5
ENSG00000198026.7	5
ENSG00000177463.14	5
ENSG00000166887.14	5
ENSG00000090615.11	5
ENSG00000100207.17	5
ENSG00000108854.14	5
ENSG00000130723.16	5
ENSG00000174989.11	5
ENSG00000198040.9	5
ENSG00000253352.7	5
ENSG00000184677.15	5
ENSG00000174233.10	5
ENSG00000174437.15	5
ENSG00000131558.13	5
ENSG00000113716.11	5
ENSG00000107815.6	5
ENSG00000083093.8	5
ENSG00000126746.16	5
ENSG00000156136.8	5
ENSG00000105443.12	5
ENSG00000129534.12	5
ENSG00000038532.13	5
ENSG00000112983.16	5
ENSG00000130150.10	5
ENSG00000103495.12	5
ENSG00000175054.13	5
ENSG00000082898.15	5
ENSG00000119041.9	5
ENSG00000147118.9	5
ENSG00000111711.8	5
ENSG00000004700.14	5
ENSG00000164402.12	5
ENSG00000001167.13	5
ENSG00000065060.15	5
ENSG00000271971.1	5
ENSG00000124422.10	5
ENSG00000107185.9	5
ENSG00000125846.14	5
ENSG00000177045.7	5
ENSG00000055483.18	5
ENSG00000182446.12	5
ENSG00000076650.5	5
ENSG00000136026.12	5
ENSG00000115159.14	5
ENSG00000186174.11	5
ENSG00000160695.13	5
ENSG00000162222.12	5
ENSG00000071794.14	5
ENSG00000143952.18	5
ENSG00000068654.14	5
ENSG00000177963.11	5
ENSG00000111203.10	5
ENSG00000178397.11	5
ENSG00000007202.13	5
ENSG00000121060.13	5
ENSG00000120314.17	5
ENSG00000076108.10	5
ENSG00000188352.11	5
ENSG00000131467.9	5
ENSG00000185019.15	5
ENSG00000184640.16	5
ENSG00000135632.10	5
ENSG00000119314.14	5
ENSG00000068097.13	5
ENSG00000108639.6	5
ENSG00000180329.12	5
ENSG00000101367.8	5
ENSG00000141580.14	5
ENSG00000169991.9	5
ENSG00000173065.12	5
ENSG00000141551.13	5
ENSG00000138375.11	5
ENSG00000136504.10	5
ENSG00000133193.11	5
ENSG00000073969.17	5
ENSG00000139624.11	5
ENSG00000073584.17	5
ENSG00000158195.9	5
ENSG00000156510.12	5
ENSG00000141279.14	5
ENSG00000108262.14	5
ENSG00000148358.18	5
ENSG00000270804.1	5
ENSG00000092098.15	5
ENSG00000126391.12	5
ENSG00000170322.13	5
ENSG00000101216.9	5
ENSG00000183340.6	5
ENSG00000276293.3	5
ENSG00000171302.15	5
ENSG00000108799.11	5
ENSG00000168591.14	5
ENSG00000015532.8	5
ENSG00000179051.12	5
ENSG00000177917.9	5
ENSG00000008710.16	5
ENSG00000169180.10	5
ENSG00000197045.11	5
ENSG00000069509.5	5
ENSG00000169217.7	5
ENSG00000185238.11	5
ENSG00000133789.13	5
ENSG00000131100.11	5
ENSG00000138801.7	5
ENSG00000136940.12	5
ENSG00000167257.9	5
ENSG00000184014.6	5
ENSG00000196305.16	5
ENSG00000094880.9	5
ENSG00000076201.13	5
ENSG00000163214.19	5
ENSG00000120800.4	5
ENSG00000148606.11	5
ENSG00000133884.8	5
ENSG00000008083.12	5
ENSG00000128059.7	5
ENSG00000108055.9	5
ENSG00000185219.14	5
ENSG00000100426.6	5
ENSG00000112242.13	5
ENSG00000171475.12	5
ENSG00000145293.13	5
ENSG00000110987.7	5
ENSG00000143190.20	5
ENSG00000188895.10	5
ENSG00000169871.11	5
ENSG00000109118.12	5
ENSG00000100281.12	5
ENSG00000186566.10	5
ENSG00000130699.15	5
ENSG00000060339.12	5
ENSG00000144580.12	5
ENSG00000107929.13	5
ENSG00000183495.12	5
ENSG00000141456.13	5
ENSG00000142396.9	5
ENSG00000179151.10	5
ENSG00000140326.11	5
ENSG00000103932.10	5
ENSG00000211553.1	5
ENSG00000204469.11	5
ENSG00000259623.1	5
ENSG00000137942.15	5
ENSG00000064012.20	5
ENSG00000131899.9	5
ENSG00000124574.13	5
ENSG00000275023.3	5
ENSG00000065491.8	5
ENSG00000087470.16	5
ENSG00000038382.16	5
ENSG00000151881.13	5
ENSG00000136715.16	5
ENSG00000106144.18	5
ENSG00000110583.11	5
ENSG00000172534.12	5
ENSG00000139350.10	5
ENSG00000166261.9	5
ENSG00000155561.13	5
ENSG00000105323.15	5
ENSG00000060749.13	5
ENSG00000020922.11	5
ENSG00000077232.15	5
ENSG00000163714.16	5
ENSG00000135387.18	5
ENSG00000106554.10	5
ENSG00000163930.8	5
ENSG00000079387.12	5
ENSG00000066117.13	5
ENSG00000174227.14	5
ENSG00000196810.4	5
ENSG00000134910.11	5
ENSG00000148660.19	5
ENSG00000213839.4	5
ENSG00000166526.15	5
ENSG00000134779.13	5
ENSG00000102225.14	5
ENSG00000103275.17	5
ENSG00000248008.2	5
ENSG00000169221.12	5
ENSG00000160877.5	5
ENSG00000140992.17	5
ENSG00000265806.1	5
ENSG00000087152.14	5
ENSG00000057935.12	5
ENSG00000155229.19	5
ENSG00000148843.12	5
ENSG00000099284.12	5
ENSG00000089154.9	5
ENSG00000124160.10	5
ENSG00000185049.11	5
ENSG00000144524.16	5
ENSG00000084774.12	5
ENSG00000171456.15	5
ENSG00000137073.19	5
ENSG00000147130.13	5
ENSG00000197694.12	5
ENSG00000101266.15	5
ENSG00000158435.6	5
ENSG00000166135.12	5
ENSG00000126003.6	5
ENSG00000125834.11	5
ENSG00000166965.11	5
ENSG00000173473.9	5
ENSG00000140553.15	5
ENSG00000119772.15	5
ENSG00000184056.13	5
ENSG00000128245.13	5
ENSG00000172888.10	5
ENSG00000113360.15	5
ENSG00000070610.13	5
ENSG00000141564.12	5
ENSG00000177728.13	5
ENSG00000182473.19	5
ENSG00000144560.12	5
ENSG00000176994.10	5
ENSG00000068650.17	5
ENSG00000164244.19	5
ENSG00000177034.13	5
ENSG00000075303.11	5
ENSG00000054965.9	5
ENSG00000166478.8	5
ENSG00000126464.12	5
ENSG00000198646.12	5
ENSG00000047410.12	5
ENSG00000128833.11	5
ENSG00000135829.15	5
ENSG00000149531.13	5
ENSG00000170471.13	5
ENSG00000116580.17	5
ENSG00000048991.15	5
ENSG00000077044.8	5
ENSG00000104081.12	5
ENSG00000162714.11	5
ENSG00000145016.12	5
ENSG00000085185.14	5
ENSG00000114744.7	5
ENSG00000198538.9	5
ENSG00000143815.13	5
ENSG00000181588.16	5
ENSG00000114982.16	5
ENSG00000132254.11	5
ENSG00000119285.9	5
ENSG00000204604.8	5
ENSG00000185340.14	5
ENSG00000138050.13	5
ENSG00000181666.16	5
ENSG00000243943.8	5
ENSG00000165209.17	5
ENSG00000168612.4	5
ENSG00000254004.5	5
ENSG00000132842.12	5
ENSG00000152359.13	5
ENSG00000101452.13	5
ENSG00000129347.18	5
ENSG00000147274.13	5
ENSG00000108883.11	5
ENSG00000068796.15	5
ENSG00000132640.13	5
ENSG00000146802.11	5
ENSG00000090924.13	5
ENSG00000197183.11	5
ENSG00000105738.9	5
ENSG00000172273.11	5
ENSG00000205268.9	5
ENSG00000183161.4	5
ENSG00000149782.10	5
ENSG00000108433.14	5
ENSG00000172732.10	5
ENSG00000011143.15	5
ENSG00000234912.8	5
ENSG00000099991.15	5
ENSG00000196498.12	5
ENSG00000130479.9	5
ENSG00000064607.15	5
ENSG00000088038.16	5
ENSG00000105576.14	5
ENSG00000131788.14	5
ENSG00000179134.13	5
ENSG00000127527.12	5
ENSG00000161847.12	5
ENSG00000130254.10	5
ENSG00000114770.15	5
ENSG00000097007.16	5
ENSG00000099331.12	5
ENSG00000111676.13	5
ENSG00000079432.6	5
ENSG00000101052.11	5
ENSG00000139645.9	5
ENSG00000129351.16	5
ENSG00000127511.8	5
ENSG00000197136.4	5
ENSG00000121058.4	5
ENSG00000008838.16	5
ENSG00000132478.8	5
ENSG00000105556.9	5
ENSG00000104852.13	5
ENSG00000185359.11	5
ENSG00000137656.10	5
ENSG00000108666.8	5
ENSG00000108395.12	5
ENSG00000175931.11	5
ENSG00000044115.19	5
ENSG00000108424.8	5
ENSG00000168256.16	5
ENSG00000168411.12	5
ENSG00000135365.14	5
ENSG00000120733.12	5
ENSG00000182952.4	5
ENSG00000162613.15	5
ENSG00000141219.14	5
ENSG00000180263.12	5
ENSG00000120071.11	5
ENSG00000136699.18	5
ENSG00000080603.15	5
ENSG00000108349.13	5
ENSG00000133706.16	5
ENSG00000163872.14	5
ENSG00000127616.16	5
ENSG00000155506.15	5
ENSG00000164818.14	5
ENSG00000133858.14	5
ENSG00000087053.17	5
ENSG00000196670.12	5
ENSG00000256525.5	5
ENSG00000103550.12	5
ENSG00000163257.9	5
ENSG00000010244.15	5
ENSG00000113649.10	5
ENSG00000114503.9	5
ENSG00000115568.14	5
ENSG00000111605.15	5
ENSG00000165671.17	5
ENSG00000087206.15	5
ENSG00000071564.13	5
ENSG00000168488.17	5
ENSG00000099364.15	5
ENSG00000161021.10	5
ENSG00000101126.14	5
ENSG00000125633.9	5
ENSG00000113300.10	5
ENSG00000115207.12	5
ENSG00000198863.6	5
ENSG00000159202.16	5
ENSG00000146083.10	5
ENSG00000176095.10	5
ENSG00000010322.14	5
ENSG00000152193.7	5
ENSG00000278540.3	5
ENSG00000131473.15	5
ENSG00000182240.14	6
ENSG00000178773.13	6
ENSG00000120875.7	6
ENSG00000106665.14	6
ENSG00000099949.17	6
ENSG00000184708.16	6
ENSG00000088899.13	6
ENSG00000105875.12	6
ENSG00000134215.14	6
ENSG00000197261.10	6
ENSG00000068078.16	6
ENSG00000176945.15	6
ENSG00000224769.1	6
ENSG00000239521.6	6
ENSG00000167861.14	6
ENSG00000227507.2	6
ENSG00000112312.8	6
ENSG00000062485.17	6
ENSG00000105825.10	6
ENSG00000225792.1	6
ENSG00000160801.12	6
ENSG00000132359.12	6
ENSG00000156711.15	6
ENSG00000262050.1	6
ENSG00000135052.15	6
ENSG00000103534.15	6
ENSG00000169894.16	6
ENSG00000267475.1	6
ENSG00000140279.11	6
ENSG00000198648.9	6
ENSG00000140274.12	6
ENSG00000185499.15	6
ENSG00000187554.10	6
ENSG00000076716.8	6
ENSG00000106003.11	6
ENSG00000175538.9	6
ENSG00000226332.2	6
ENSG00000188290.9	6
ENSG00000091136.12	6
ENSG00000163191.5	6
ENSG00000136379.10	6
ENSG00000102359.5	6
ENSG00000181885.17	6
ENSG00000082014.15	6
ENSG00000243449.5	6
ENSG00000161249.19	6
ENSG00000133065.9	6
ENSG00000111371.14	6
ENSG00000134138.18	6
ENSG00000170004.15	6
ENSG00000175274.17	6
ENSG00000213977.6	6
ENSG00000167695.13	6
ENSG00000115419.11	6
ENSG00000105329.8	6
ENSG00000182718.15	6
ENSG00000165105.9	6
ENSG00000163898.8	6
ENSG00000137673.7	6
ENSG00000123095.5	6
ENSG00000100321.13	6
ENSG00000104218.12	6
ENSG00000158711.12	6
ENSG00000139146.12	6
ENSG00000100985.7	6
ENSG00000126878.11	6
ENSG00000103056.10	6
ENSG00000092969.10	6
ENSG00000100311.15	6
ENSG00000106077.17	6
ENSG00000107159.11	6
ENSG00000165757.8	6
ENSG00000122863.5	6
ENSG00000113657.11	6
ENSG00000023171.13	6
ENSG00000165929.11	6
ENSG00000179913.9	6
ENSG00000099812.7	6
ENSG00000267194.1	6
ENSG00000108984.12	6
ENSG00000115539.12	6
ENSG00000104413.14	6
ENSG00000119411.10	6
ENSG00000149418.9	6
ENSG00000196588.13	6
ENSG00000145014.16	6
ENSG00000100271.15	6
ENSG00000006534.14	6
ENSG00000159314.10	6
ENSG00000070882.11	6
ENSG00000173442.10	6
ENSG00000137819.12	6
ENSG00000164181.12	6
ENSG00000229656.5	6
ENSG00000104881.13	6
ENSG00000071051.12	6
ENSG00000107819.12	6
ENSG00000110328.5	6
ENSG00000260015.1	6
ENSG00000168743.11	6
ENSG00000113361.11	6
ENSG00000125966.9	6
ENSG00000261183.4	6
ENSG00000164171.9	6
ENSG00000127328.20	6
ENSG00000091490.9	6
ENSG00000080293.8	6
ENSG00000188112.7	6
ENSG00000167608.10	6
ENSG00000213983.10	6
ENSG00000131037.13	6
ENSG00000105664.9	6
ENSG00000119888.9	6
ENSG00000167642.11	6
ENSG00000170962.11	6
ENSG00000205336.10	6
ENSG00000138119.15	6
ENSG00000130529.14	6
ENSG00000096433.9	6
ENSG00000159166.12	6
ENSG00000167183.2	6
ENSG00000079691.16	6
ENSG00000099219.12	6
ENSG00000070413.17	6
ENSG00000124920.12	6
ENSG00000189143.9	6
ENSG00000152127.7	6
ENSG00000151690.13	6
ENSG00000170545.15	6
ENSG00000162909.16	6
ENSG00000058085.13	6
ENSG00000233369.6	6
ENSG00000204580.10	6
ENSG00000047849.20	6
ENSG00000084733.9	6
ENSG00000138036.17	6
ENSG00000050344.8	6
ENSG00000138448.10	6
ENSG00000180891.11	6
ENSG00000111674.7	6
ENSG00000106789.11	6
ENSG00000109610.5	6
ENSG00000267344.1	6
ENSG00000104783.10	6
ENSG00000277639.1	6
ENSG00000249007.1	6
ENSG00000073756.10	6
ENSG00000103044.9	6
ENSG00000183963.17	6
ENSG00000196655.8	6
ENSG00000145506.12	6
ENSG00000158106.11	6
ENSG00000198435.3	6
ENSG00000166900.13	6
ENSG00000135736.5	6
ENSG00000197905.7	6
ENSG00000107731.11	6
ENSG00000231991.4	6
ENSG00000136883.11	6
ENSG00000184307.12	6
ENSG00000188157.12	6
ENSG00000005448.15	6
ENSG00000172830.11	6
ENSG00000103335.18	6
ENSG00000136848.15	6
ENSG00000184916.7	6
ENSG00000160796.15	6
ENSG00000140297.11	6
ENSG00000176463.12	6
ENSG00000105327.14	6
ENSG00000132698.12	6
ENSG00000105655.17	6
ENSG00000105963.12	6
ENSG00000143412.8	6
ENSG00000042062.10	6
ENSG00000132639.11	6
ENSG00000151882.10	6
ENSG00000182795.12	6
ENSG00000174996.10	6
ENSG00000076864.18	6
ENSG00000147408.13	6
ENSG00000102034.15	6
ENSG00000137731.12	6
ENSG00000240583.9	6
ENSG00000186716.18	6
ENSG00000215012.7	6
ENSG00000134247.9	6
ENSG00000171224.8	6
ENSG00000143036.15	6
ENSG00000133059.15	6
ENSG00000115561.13	6
ENSG00000180914.9	6
ENSG00000067057.15	6
ENSG00000130702.12	6
ENSG00000146038.10	6
ENSG00000087111.19	6
ENSG00000145103.11	6
ENSG00000019505.6	6
ENSG00000101079.19	6
ENSG00000163399.14	6
ENSG00000188549.11	6
ENSG00000164574.14	6
ENSG00000132470.12	6
ENSG00000158158.10	6
ENSG00000104140.6	6
ENSG00000141738.12	6
ENSG00000144283.20	6
ENSG00000143061.16	6
ENSG00000099282.8	6
ENSG00000006118.13	6
ENSG00000171219.8	6
ENSG00000142949.15	6
ENSG00000162522.9	6
ENSG00000170113.14	6
ENSG00000011566.13	6
ENSG00000154760.12	6
ENSG00000116815.14	6
ENSG00000235162.7	6
ENSG00000160991.14	6
ENSG00000167767.12	6
ENSG00000120162.9	6
ENSG00000124225.14	6
ENSG00000108557.16	6
ENSG00000136193.15	6
ENSG00000128581.14	6
ENSG00000109089.7	6
ENSG00000183723.11	6
ENSG00000007384.14	6
ENSG00000106012.16	6
ENSG00000144959.8	6
ENSG00000159214.11	6
ENSG00000171729.12	6
ENSG00000113758.12	6
ENSG00000185101.11	6
ENSG00000148341.16	6
ENSG00000164877.17	6
ENSG00000081923.9	6
ENSG00000168615.10	6
ENSG00000095066.10	6
ENSG00000100300.16	6
ENSG00000105643.8	6
ENSG00000141934.8	6
ENSG00000051128.17	6
ENSG00000135373.11	6
ENSG00000066322.11	6
ENSG00000121900.17	6
ENSG00000196371.3	6
ENSG00000090020.9	6
ENSG00000175115.10	6
ENSG00000172819.15	6
ENSG00000176454.12	6
ENSG00000157827.18	6
ENSG00000005884.16	6
ENSG00000165238.15	6
ENSG00000166145.13	6
ENSG00000100246.11	6
ENSG00000109736.13	6
ENSG00000061273.16	6
ENSG00000064547.12	6
ENSG00000163975.10	6
ENSG00000173621.8	6
ENSG00000177685.15	6
ENSG00000175920.14	6
ENSG00000163121.8	6
ENSG00000122870.10	6
ENSG00000176928.5	6
ENSG00000189334.7	6
ENSG00000125733.16	6
ENSG00000250318.1	6
ENSG00000101384.10	6
ENSG00000163701.17	6
ENSG00000011523.12	6
ENSG00000157259.6	6
ENSG00000073350.12	6
ENSG00000013573.15	6
ENSG00000002016.15	6
ENSG00000146072.6	6
ENSG00000122515.13	6
ENSG00000141424.11	6
ENSG00000020129.14	6
ENSG00000129667.11	6
ENSG00000148468.15	6
ENSG00000138439.11	6
ENSG00000103222.17	6
ENSG00000258793.1	6
ENSG00000214049.6	6
ENSG00000006576.15	7
ENSG00000273837.1	7
ENSG00000008256.14	7
ENSG00000276231.3	7
ENSG00000255422.1	7
ENSG00000185291.9	7
ENSG00000249751.3	7
ENSG00000171700.12	7
ENSG00000100767.14	7
ENSG00000146376.9	7
ENSG00000128606.11	7
ENSG00000104332.10	7
ENSG00000110077.13	7
ENSG00000122861.14	7
ENSG00000174837.13	7
ENSG00000162745.9	7
ENSG00000128656.12	7
ENSG00000183160.8	7
ENSG00000149090.10	7
ENSG00000167552.12	7
ENSG00000163359.14	7
ENSG00000108947.4	7
ENSG00000181896.10	7
ENSG00000122824.9	7
ENSG00000264629.1	7
ENSG00000112175.7	7
ENSG00000079931.13	7
ENSG00000135439.10	7
ENSG00000211899.6	7
ENSG00000175040.5	7
ENSG00000145824.11	7
ENSG00000128218.7	7
ENSG00000049540.15	7
ENSG00000131401.10	7
ENSG00000169313.9	7
ENSG00000106809.9	7
ENSG00000243279.3	7
ENSG00000119655.7	7
ENSG00000171049.8	7
ENSG00000254415.3	7
ENSG00000171051.7	7
ENSG00000186407.6	7
ENSG00000187116.12	7
ENSG00000125740.12	7
ENSG00000265107.2	7
ENSG00000122877.12	7
ENSG00000179388.8	7
ENSG00000271780.1	7
ENSG00000105281.11	7
ENSG00000128595.15	7
ENSG00000128617.2	7
ENSG00000159363.16	7
ENSG00000087245.11	7
ENSG00000106683.13	7
ENSG00000069849.9	7
ENSG00000006638.10	7
ENSG00000100065.13	7
ENSG00000109501.12	7
ENSG00000126458.3	7
ENSG00000146374.12	7
ENSG00000173267.12	7
ENSG00000172270.17	7
ENSG00000117115.11	7
ENSG00000101400.5	7
ENSG00000234546.2	7
ENSG00000105270.13	7
ENSG00000118971.6	7
ENSG00000102109.8	7
ENSG00000269936.3	7
ENSG00000174807.3	7
ENSG00000171159.4	7
ENSG00000107816.16	7
ENSG00000140931.18	7
ENSG00000124491.14	7
ENSG00000161643.11	7
ENSG00000236120.5	7
ENSG00000161640.14	7
ENSG00000102900.11	7
ENSG00000100139.12	7
ENSG00000100083.17	7
ENSG00000280527.1	7
ENSG00000106636.6	7
ENSG00000164603.10	7
ENSG00000176619.9	7
ENSG00000167553.13	7
ENSG00000122642.9	7
ENSG00000064300.7	7
ENSG00000112936.17	7
ENSG00000178343.4	7
ENSG00000170801.8	7
ENSG00000174640.11	7
ENSG00000005059.14	7
ENSG00000211895.4	7
ENSG00000135269.16	7
ENSG00000130635.14	7
ENSG00000164692.16	7
ENSG00000119185.11	7
ENSG00000152661.7	7
ENSG00000166086.11	7
ENSG00000111341.8	7
ENSG00000147852.14	7
ENSG00000203883.6	7
ENSG00000234147.1	7
ENSG00000148908.13	7
ENSG00000186998.14	7
ENSG00000140511.10	7
ENSG00000149091.14	7
ENSG00000256594.6	7
ENSG00000142459.7	7
ENSG00000170955.9	7
ENSG00000105397.12	7
ENSG00000056558.9	7
ENSG00000140853.14	7
ENSG00000087237.9	7
ENSG00000071991.7	7
ENSG00000117643.13	7
ENSG00000133800.7	7
ENSG00000129538.12	7
ENSG00000101850.11	7
ENSG00000053702.13	7
ENSG00000135218.16	7
ENSG00000159685.9	7
ENSG00000127954.11	7
ENSG00000162998.4	7
ENSG00000108381.9	7
ENSG00000105609.15	7
ENSG00000183597.14	7
ENSG00000170323.7	7
ENSG00000130158.12	7
ENSG00000279496.1	7
ENSG00000163521.14	7
ENSG00000228594.3	7
ENSG00000244734.2	7
ENSG00000119632.3	7
ENSG00000131730.14	7
ENSG00000107130.8	7
ENSG00000134871.16	7
ENSG00000095370.18	7
ENSG00000101331.14	7
ENSG00000128917.6	7
ENSG00000143248.11	7
ENSG00000197102.9	7
ENSG00000204301.6	7
ENSG00000132622.9	7
ENSG00000154096.12	7
ENSG00000157510.12	7
ENSG00000128567.15	7
ENSG00000261371.4	7
ENSG00000164035.8	7
ENSG00000064989.11	7
ENSG00000139567.11	7
ENSG00000187498.13	7
ENSG00000174059.15	7
ENSG00000074181.7	7
ENSG00000198844.9	7
ENSG00000104368.16	7
ENSG00000198792.11	7
ENSG00000166147.12	7
ENSG00000176435.6	7
ENSG00000161940.9	7
ENSG00000113555.5	7
ENSG00000116786.10	7
ENSG00000008853.15	7
ENSG00000135842.15	7
ENSG00000162430.15	7
ENSG00000121064.11	7
ENSG00000131477.9	7
ENSG00000079263.17	7
ENSG00000112769.17	7
ENSG00000011465.15	7
ENSG00000091986.14	7
ENSG00000132170.18	7
ENSG00000148288.10	7
ENSG00000178498.14	7
ENSG00000240771.5	7
ENSG00000188060.6	7
ENSG00000177575.11	7
ENSG00000132205.9	7
ENSG00000268734.1	7
ENSG00000132688.10	7
ENSG00000117122.12	7
ENSG00000075618.16	7
ENSG00000131389.15	7
ENSG00000137573.12	7
ENSG00000074590.12	7
ENSG00000100124.11	7
ENSG00000149257.12	7
ENSG00000176903.4	7
ENSG00000166997.6	7
ENSG00000042493.14	7
ENSG00000154146.11	7
ENSG00000149179.12	7
ENSG00000166451.12	7
ENSG00000174099.9	7
ENSG00000072121.14	7
ENSG00000144668.10	7
ENSG00000241644.2	7
ENSG00000196990.7	7
ENSG00000179715.11	7
ENSG00000110237.3	7
ENSG00000121068.12	7
ENSG00000163736.3	7
ENSG00000108821.12	7
ENSG00000168542.11	7
ENSG00000204262.10	7
ENSG00000084636.16	7
ENSG00000176971.3	7
ENSG00000125538.10	7
ENSG00000184601.9	7
ENSG00000198467.12	7
ENSG00000151376.15	7
ENSG00000115204.13	7
ENSG00000099994.10	7
ENSG00000076706.13	7
ENSG00000130300.7	7
ENSG00000206172.7	7
ENSG00000174705.10	7
ENSG00000106483.10	7
ENSG00000107796.11	7
ENSG00000104833.9	7
ENSG00000162302.11	7
ENSG00000143226.12	7
ENSG00000228168.1	7
ENSG00000277632.1	7
ENSG00000157111.11	7
ENSG00000175592.7	7
ENSG00000129038.14	7
ENSG00000134013.14	7
ENSG00000163661.3	7
ENSG00000024422.10	7
ENSG00000141349.7	7
ENSG00000128383.11	7
ENSG00000136295.13	7
ENSG00000186340.13	7
ENSG00000146535.12	7
ENSG00000155659.13	7
ENSG00000174791.9	7
ENSG00000130176.6	7
ENSG00000261040.5	7
ENSG00000145423.4	7
ENSG00000138185.15	7
ENSG00000163378.12	7
ENSG00000164111.13	7
ENSG00000105974.10	7
ENSG00000183386.8	7
ENSG00000111799.19	7
ENSG00000221955.9	7
ENSG00000143196.4	7
ENSG00000179364.12	7
ENSG00000165915.12	7
ENSG00000107562.15	7
ENSG00000150625.15	7
ENSG00000162551.12	7
ENSG00000162576.15	7
ENSG00000131711.13	7
ENSG00000163520.12	7
ENSG00000117461.13	7
ENSG00000188536.11	7
ENSG00000196924.13	7
ENSG00000196923.12	7
ENSG00000135596.16	7
ENSG00000140545.13	7
ENSG00000167123.17	7
ENSG00000116871.14	7
ENSG00000100097.10	7
ENSG00000186111.7	7
ENSG00000113140.9	7
ENSG00000161791.12	7
ENSG00000158747.12	7
ENSG00000104812.13	7
ENSG00000164294.12	7
ENSG00000067225.16	7
ENSG00000172081.12	7
ENSG00000107719.8	7
ENSG00000157227.11	7
ENSG00000004399.11	7
ENSG00000134851.11	7
ENSG00000139514.11	7
ENSG00000167460.13	7
ENSG00000140464.18	7
ENSG00000266088.4	7
ENSG00000197956.8	7
ENSG00000166211.7	7
ENSG00000143369.13	7
ENSG00000135723.12	7
ENSG00000203710.9	7
ENSG00000211716.2	7
ENSG00000132465.9	7
ENSG00000161929.13	7
ENSG00000186810.7	7
ENSG00000142798.15	7
ENSG00000104974.9	7
ENSG00000089012.13	7
ENSG00000163599.13	7
ENSG00000163909.7	7
ENSG00000168995.12	7
ENSG00000167286.8	7
ENSG00000113721.12	7
ENSG00000181631.6	7
ENSG00000108700.4	7
ENSG00000229754.1	7
ENSG00000128594.6	7
ENSG00000156049.6	7
ENSG00000126759.11	7
ENSG00000111906.16	7
ENSG00000119681.10	7
ENSG00000189319.12	7
ENSG00000095970.15	7
ENSG00000142185.15	7
ENSG00000150594.6	7
ENSG00000197535.13	7
ENSG00000009830.10	7
ENSG00000119508.16	7
ENSG00000150045.10	7
ENSG00000239998.4	7
ENSG00000213923.9	7
ENSG00000010610.8	7
ENSG00000145850.7	7
ENSG00000172322.12	7
ENSG00000139278.8	7
ENSG00000013016.13	7
ENSG00000138722.8	7
ENSG00000197245.4	7
ENSG00000112562.17	7
ENSG00000130309.9	7
ENSG00000162458.11	7
ENSG00000007944.13	7
ENSG00000126351.11	7
ENSG00000114554.10	7
ENSG00000178878.11	7
ENSG00000133110.13	7
ENSG00000083720.11	7
ENSG00000134028.13	7
ENSG00000256948.1	7
ENSG00000204564.10	8
ENSG00000204386.9	8
ENSG00000124562.8	8
ENSG00000171453.16	8
ENSG00000124784.7	8
ENSG00000204394.11	8
ENSG00000137168.7	8
ENSG00000227057.6	8
ENSG00000096384.18	8
ENSG00000112578.8	8
ENSG00000124541.6	8
ENSG00000184575.10	8
ENSG00000044090.7	8
ENSG00000112130.15	8
ENSG00000204344.13	8
ENSG00000204348.8	8
ENSG00000204576.10	8
ENSG00000204351.10	8
ENSG00000112186.10	8
ENSG00000204498.9	8
ENSG00000204438.9	8
ENSG00000124702.16	8
ENSG00000112514.14	8
ENSG00000112667.11	8
ENSG00000204315.3	8
ENSG00000204536.12	8
ENSG00000204560.8	8
ENSG00000198663.15	8
ENSG00000137207.10	8
ENSG00000223501.7	8
ENSG00000213676.9	8
ENSG00000204227.4	8
ENSG00000065029.13	8
ENSG00000204231.9	8
ENSG00000196812.4	8
ENSG00000170734.10	8
ENSG00000145996.10	8
ENSG00000112308.11	8
ENSG00000096070.18	8
ENSG00000187626.8	8
ENSG00000168116.12	8
ENSG00000197062.10	8
ENSG00000124608.4	8
ENSG00000198315.9	8
ENSG00000171467.14	8
ENSG00000111843.12	8
ENSG00000112146.15	8
ENSG00000204713.9	8
ENSG00000204310.9	8
ENSG00000204439.3	8
ENSG00000096063.13	8
ENSG00000213780.9	8
ENSG00000124571.16	8
ENSG00000124641.13	8
ENSG00000112659.12	8
ENSG00000137218.9	8
ENSG00000064995.15	8
ENSG00000137166.13	8
ENSG00000112640.13	8
ENSG00000157593.15	8
ENSG00000007866.17	8
ENSG00000112473.15	8
ENSG00000225921.5	8
ENSG00000237441.8	8
ENSG00000137221.13	8
ENSG00000172432.17	8
ENSG00000204220.8	8
ENSG00000180822.10	8
ENSG00000137185.10	8
ENSG00000204304.10	8
ENSG00000241370.4	8
ENSG00000196230.11	8
ENSG00000204371.10	8
ENSG00000204463.11	8
ENSG00000204209.9	8
ENSG00000124659.6	8
ENSG00000124733.3	8
ENSG00000137312.13	8
ENSG00000204356.10	8
ENSG00000204599.13	8
ENSG00000137409.17	8
ENSG00000236104.2	8
ENSG00000161904.10	8
ENSG00000112511.16	8
ENSG00000137343.16	8
ENSG00000090447.10	9
ENSG00000176182.5	9
ENSG00000176058.10	9
ENSG00000181524.6	9
ENSG00000160072.18	9
ENSG00000034510.5	9
ENSG00000124802.10	9
ENSG00000047579.18	9
ENSG00000244045.9	9
ENSG00000105204.12	9
ENSG00000148688.12	9
ENSG00000108592.15	9
ENSG00000128626.10	9
ENSG00000214113.9	9
ENSG00000269858.4	9
ENSG00000215305.8	9
ENSG00000125817.7	9
ENSG00000116649.8	9
ENSG00000141562.16	9
ENSG00000178927.15	9
ENSG00000040487.11	9
ENSG00000130511.14	9
ENSG00000105726.15	9
ENSG00000139579.11	9
ENSG00000131475.5	9
ENSG00000181610.11	9
ENSG00000167657.10	9
ENSG00000148399.10	9
ENSG00000185262.8	9
ENSG00000166788.8	9
ENSG00000101146.11	9
ENSG00000213722.7	9
ENSG00000169689.13	9
ENSG00000221500.1	9
ENSG00000169683.6	9
ENSG00000267565.1	9
ENSG00000189159.14	9
ENSG00000266680.1	9
ENSG00000102977.12	9
ENSG00000070495.13	9
ENSG00000148362.9	9
ENSG00000177239.13	9
ENSG00000161179.12	9
ENSG00000135587.7	9
ENSG00000257698.1	9
ENSG00000172757.11	9
ENSG00000214182.5	9
ENSG00000197744.5	9
ENSG00000205763.12	9
ENSG00000160410.13	9
ENSG00000188986.4	9
ENSG00000107021.14	9
ENSG00000160563.12	9
ENSG00000238227.6	9
ENSG00000242071.3	9
ENSG00000139239.7	9
ENSG00000235174.1	9
ENSG00000218426.5	9
ENSG00000175130.6	9
ENSG00000213939.4	9
ENSG00000231767.3	9
ENSG00000212664.5	9
ENSG00000235605.1	9
ENSG00000239246.3	9
ENSG00000087088.18	9
ENSG00000234851.4	9
ENSG00000234287.1	9
ENSG00000224578.4	9
ENSG00000242299.1	9
ENSG00000234648.1	9
ENSG00000213553.4	9
ENSG00000232888.4	9
ENSG00000232346.1	9
ENSG00000111229.14	9
ENSG00000137309.18	9
ENSG00000187109.12	9
ENSG00000088986.9	9
ENSG00000170515.12	9
ENSG00000177192.12	9
ENSG00000137692.10	9
ENSG00000204237.4	9
ENSG00000175203.14	9
ENSG00000100997.17	9
ENSG00000167272.9	9
ENSG00000148331.10	9
ENSG00000188486.3	9
ENSG00000104907.11	9
ENSG00000276967.1	9
ENSG00000196756.10	9
ENSG00000240230.4	9
ENSG00000118162.12	9
ENSG00000077348.7	9
ENSG00000206630.1	9
ENSG00000105245.8	9
ENSG00000066379.13	9
ENSG00000243199.1	9
ENSG00000107833.9	9
ENSG00000167747.12	9
ENSG00000161277.10	9
ENSG00000070010.17	9
ENSG00000240342.3	9
ENSG00000197149.5	9
ENSG00000245970.2	9
ENSG00000100056.10	9
ENSG00000222041.9	9
ENSG00000172965.13	9
ENSG00000144591.16	9
ENSG00000007047.13	9
ENSG00000128524.4	9
ENSG00000154832.13	9
ENSG00000182544.8	9
ENSG00000196510.11	9
ENSG00000172113.7	9
ENSG00000168268.9	9
ENSG00000025770.17	9
ENSG00000182173.11	9
ENSG00000126768.11	9
ENSG00000141552.16	9
ENSG00000198918.7	9
ENSG00000198746.11	9
ENSG00000257727.4	9
ENSG00000199753.1	9
ENSG00000244398.1	9
ENSG00000224877.3	9
ENSG00000124155.15	9
ENSG00000159210.8	9
ENSG00000134825.12	9
ENSG00000168061.12	9
ENSG00000166012.13	9
ENSG00000229119.3	9
ENSG00000202337.1	9
[truncated: 372 more rows]
